# Supplementary material
Source: publisher figshare collection journal article supplement (https://sage.figshare.com/ndownloader/files/22090059)
Supplement: Supplementary file 1 [file 22090059]

## Appendix 1 modified GM-SAT summary report

This report has been updated and is freely available for download from <http://bit.ly/GM-SAT>

### Summary Report: 6 Month Post Stroke Review in care homes

|             |  |                              |  |
|-------------|--|------------------------------|--|
| Forename    |  | Surname                      |  |
| NHS No.     |  | Review Date                  |  |
| Reviewed by |  | Carer's Name (if applicable) |  |

At your review your blood pressure was \_\_\_\_ / \_\_\_\_  
and we identified that you have some needs in relations to the following areas:

|                                               |                                            |                                              |                                                    |
|-----------------------------------------------|--------------------------------------------|----------------------------------------------|----------------------------------------------------|
| Meds Management <input type="checkbox"/>      | Vision <input type="checkbox"/>            | ADL's <input type="checkbox"/>               | Sleep pattern <input type="checkbox"/>             |
| Meds Compliance <input type="checkbox"/>      | Hearing <input type="checkbox"/>           | Foot Care <input type="checkbox"/>           | Memory, Concentn, attentn <input type="checkbox"/> |
| Blood Pressure <input type="checkbox"/>       | Communication <input type="checkbox"/>     | Mobility <input type="checkbox"/>            | Transport & travel <input type="checkbox"/>        |
| Anti-Thrombotics <input type="checkbox"/>     | Swallowing <input type="checkbox"/>        | Falls <input type="checkbox"/>               | Activities & hobbies <input type="checkbox"/>      |
| Cholesterol Control <input type="checkbox"/>  | Oral Health <input type="checkbox"/>       | Mood/Depression <input type="checkbox"/>     | Benefits & finances <input type="checkbox"/>       |
| Glycaemic Control <input type="checkbox"/>    | Nutrition <input type="checkbox"/>         | Anxiety <input type="checkbox"/>             | House & home <input type="checkbox"/>              |
| Alcohol <input type="checkbox"/>              | Weight Management <input type="checkbox"/> | Emotionalism <input type="checkbox"/>        | Family/supporter needs <input type="checkbox"/>    |
| Smoking <input type="checkbox"/>              | Pain <input type="checkbox"/>              | Personality changes <input type="checkbox"/> |                                                    |
| Diet/ Healthy Eating <input type="checkbox"/> | Skin <input type="checkbox"/>              | Relationships <input type="checkbox"/>       |                                                    |
| Exercise <input type="checkbox"/>             | Continence <input type="checkbox"/>        | Fatigue <input type="checkbox"/>             |                                                    |
| Other <input type="checkbox"/>                |                                            |                                              |                                                    |

Summary of needs identified:

Actions for YOU:

Actions for US (reviewer, stroke team & care home staff)

Actions for your G.P Practice

Any other notes:

A copy of this summary has been automatically sent to your GP (unless stated otherwise at your review)  
For further information see [www.nhs.uk](http://www.nhs.uk) and enter a search term relating to your health condition e.g.  
stroke

Reviewer Signature:

Time take to complete review:

For further information please contact the Community Stroke Team on

## Appendix 2 Interview topic guides

This is a guideline to the areas that were covered in the interview. The guide was used according to the needs of the respondent e.g. communication needs. Responses were probed and followed up, and interviewees were asked to give examples to illustrate their responses.

### Assessors

#### **General background**

- What is your professional background and how you have come to this role?
- Are you the only one who carries out post-stroke reviews in your team?

#### **The process of the six month review with care home residents**

- How do you identify care home residents who need a review?
- Are there any barriers to providing effective reviews for stroke survivors in care homes? How may these be overcome?
- Will you usually have met people prior to carrying out their review?
- Do you include families in the review? How do you contact them/invite them to the review?
- Do you include care home staff in the review?

#### **The outcomes of the six month review with care home residents**

- Are the needs you identify in this population different to others e.g. those living at home?
- Do you encounter any difficulties addressing the needs identified?
- What happens after the review – how do you document the outcomes of the review?
- Do you conduct any sort of follow-up after the review? If not, why not?

#### **The value of the six month post stroke review**

- Do you think there is value in carrying out a six month review with care home residents?
- Is this the same as for stroke survivors who live in their own homes?

#### **The modified GM-SAT**

- What was your experience of using the modified GM-SAT? Was there anything about it which you particularly valued? Anything about it that you found particularly problematic?
- How do you use it? How do you start? Do you work your way through it? Do you ensure that you cover all of the content?
- What do you think of it as a tool to be used for reviews with care home residents?
- How would you alter it to make it more appropriate / easier to use?

#### **Finally**

- Is there anything else you would like to tell us about doing six month reviews in care homes that we haven't covered?

### Review Participants

#### **General background**

- Were you living here before you had your stroke?
- What do you think of the care here, in general?

#### **The process and outcomes of the review**

You recently met with someone to talk about how you have been since you had your stroke.

- Do you remember that visit?
- Did you know the person who came to visit you?
- Did you know that they were coming to see you before they arrived?

- Was anybody else here with you when you had that talk?
  - Is there anybody (else) that you might like to have been there with you?
- What kind of things did you talk about?
- Did you talk to her/him about any problems that you are having?
  - Did he or she suggest anything that might be able to help with these things?
  - Do you know what is happening now about them?

**The value of the six month post stroke review**

- How did you feel when you were having the talk with X?
- Do you think it was a useful talk?
- Is there anything that you didn't talk about that you would have liked to? Why didn't you talk about these things?

**Finally**

- Is there anything else you would like to tell us about the review/talk that you had with X that we haven't covered?
